# Supplementary material for: Systematic Review and Meta-Analysis of Statin Use and Mortality, Intensive Care Unit Admission and Requirement for Mechanical Ventilation in COVID-19 Patients
Source: MDPI journal article supplement (doi:10.3390/jcm11185454), 2022-09-16
Supplement: s1 [file s1]

# Systematic review and meta-analysis of statin use and COVID-19 severity outcomes

## Supplementary Information

### Supplementary Figure S1 – Funnel plot and asymmetry analysis for mortality odds and hazard ratio

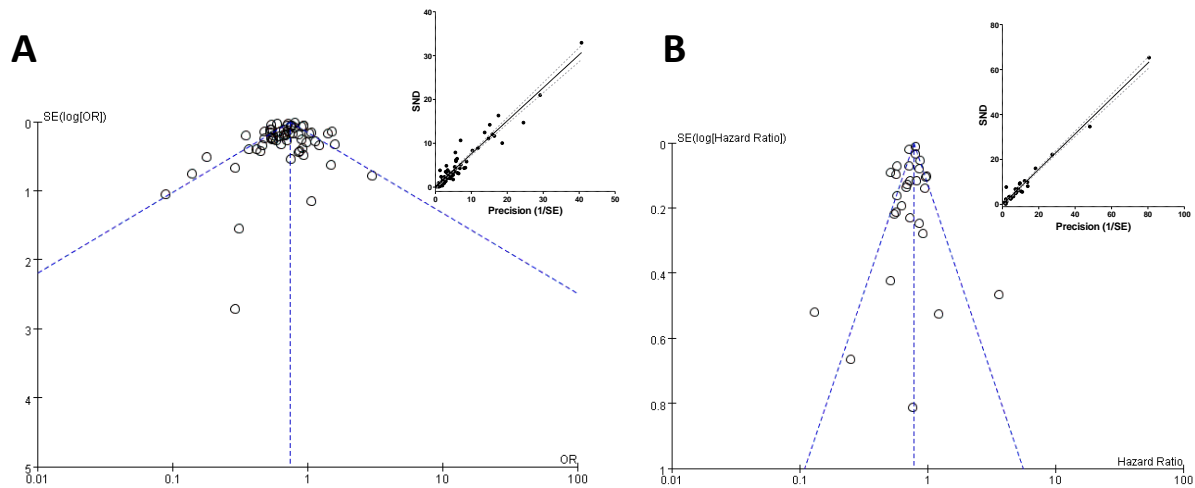

Funnel plots of the standard error of the logarithm of the mortality odds (A) or hazard ratio (B). Vertical dotted lines indicate the overall effect and the slanted dotted lines indicate the 95% confidence interval. Inset shows the Egger's regression of the standard normalised difference (SND) against the precision (1/SE). The solid lines are the non-weighted linear regression and the dotted lines indicate the 90% confidence interval of the linear regression. Our analysis reveal no significant asymmetry in the funnel plots ( $P = 0.87$  for OR and  $P = 0.73$  for HR).

**Supplementary Figure S2 – Sensitivity analysis of individual study effect on mortality odds ratio**

**Study removed:**

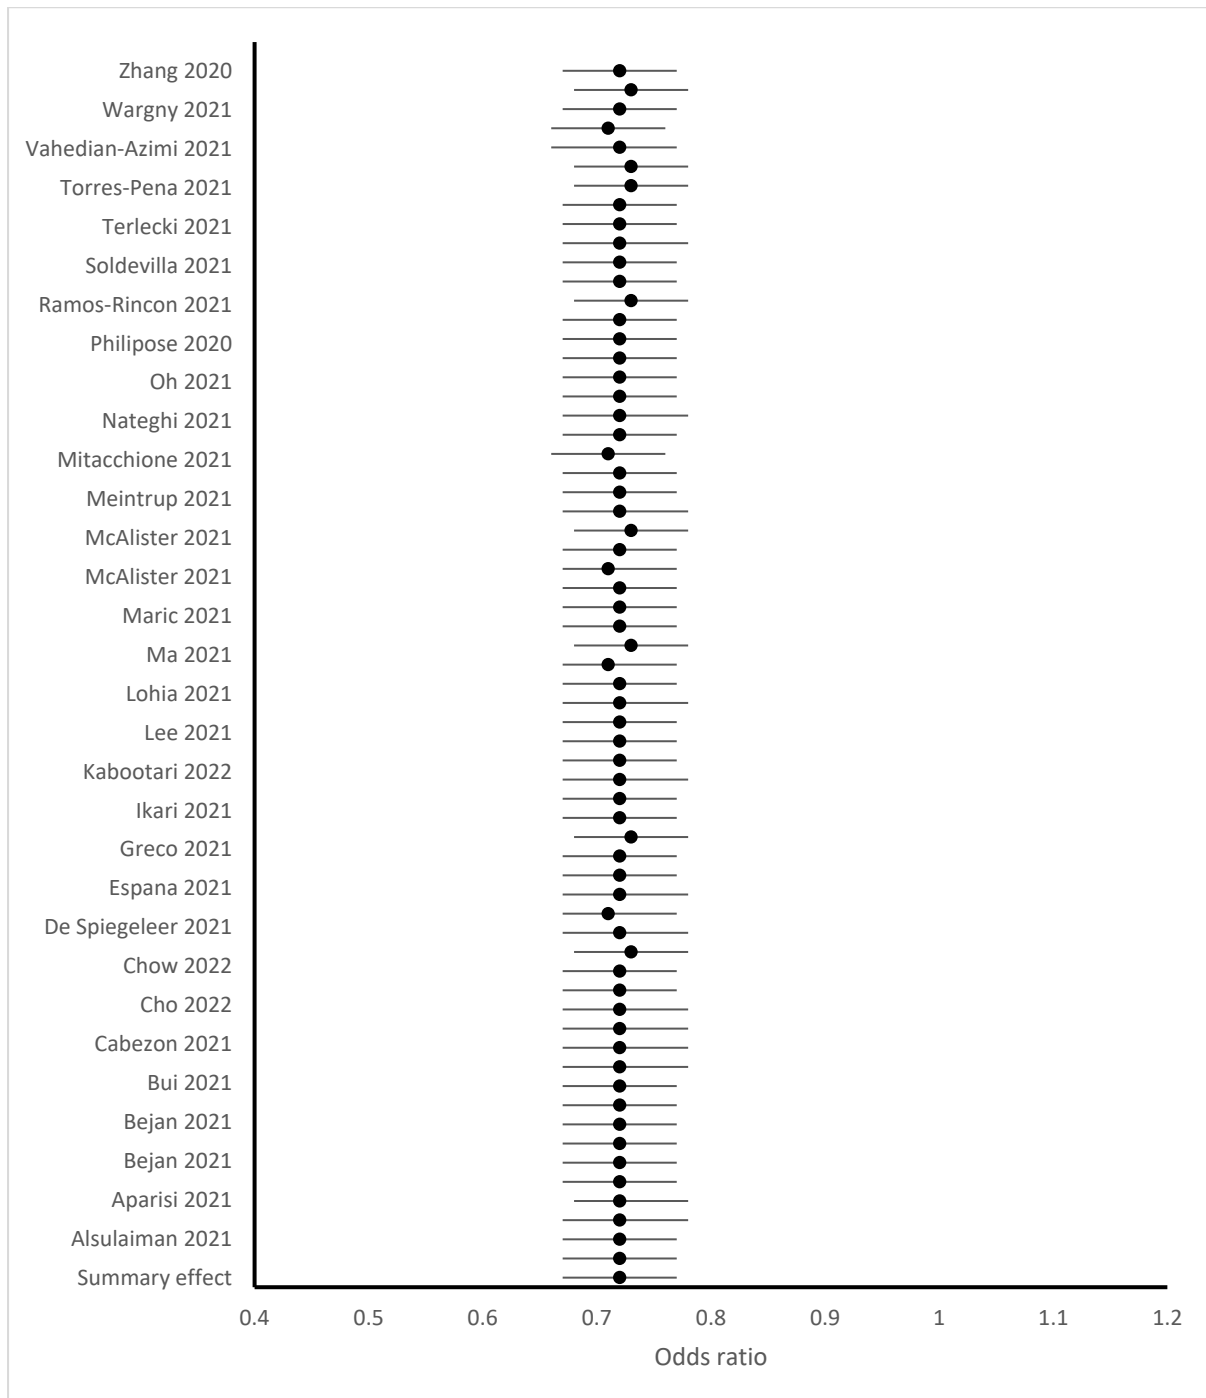

Sensitivity analysis of the data by observing the effect on the overall summary effect (shown at the bottom of the graph) through removing sequential studies. Our analysis reveal that there is no single study the removal of which affects the overall summary effect.

# Supplementary Figure S3 – Sensitivity analysis of studies with or without propensity score matching effect on mortality odds ratio

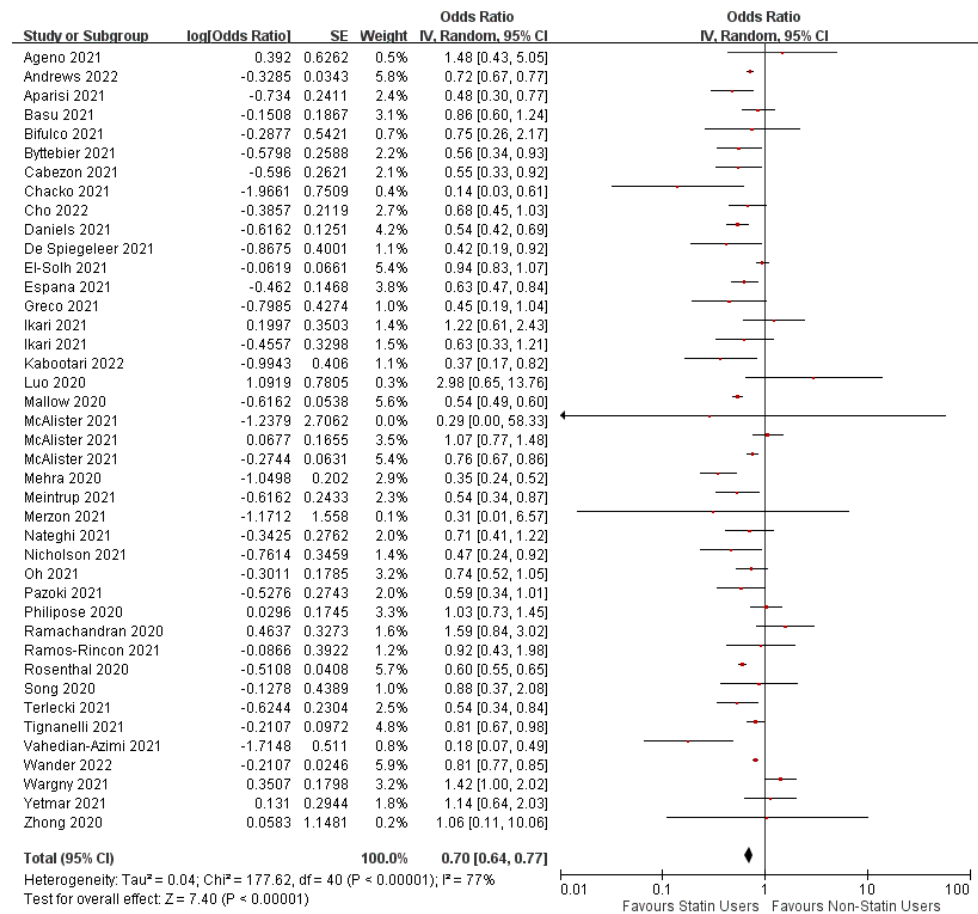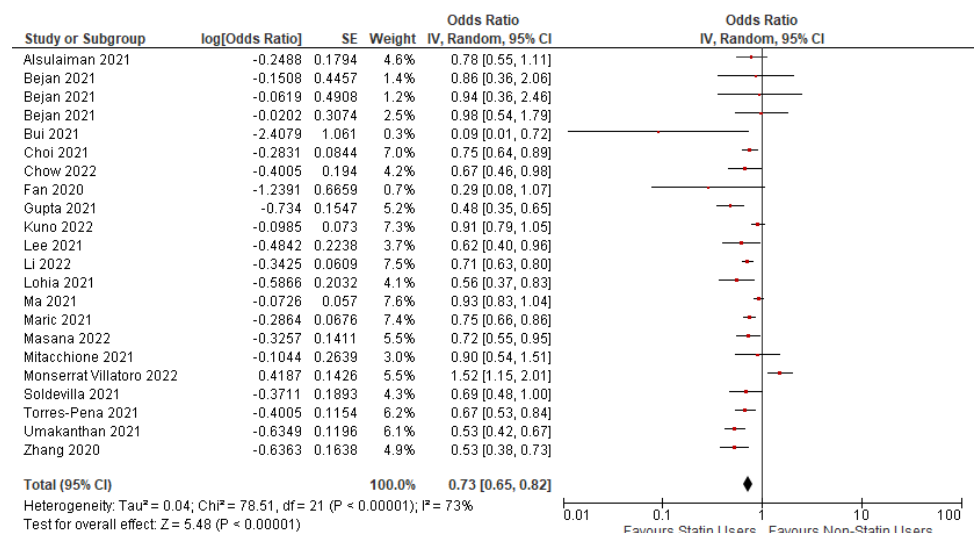

Sensitivity analysis of the mortality odds ratio summary effect by performing separate analysis of studies without (top) or with (bottom) propensity score matching. Our analysis reveal that studies with or without propensity score matching had qualitatively and quantitatively the same effect on the overall estimate. The extent of heterogeneity is also similar in the two groups of studies.

## Supplementary Figure S4 – Sensitivity analysis of individual study effect on mortality hazard ratio

Study removed:

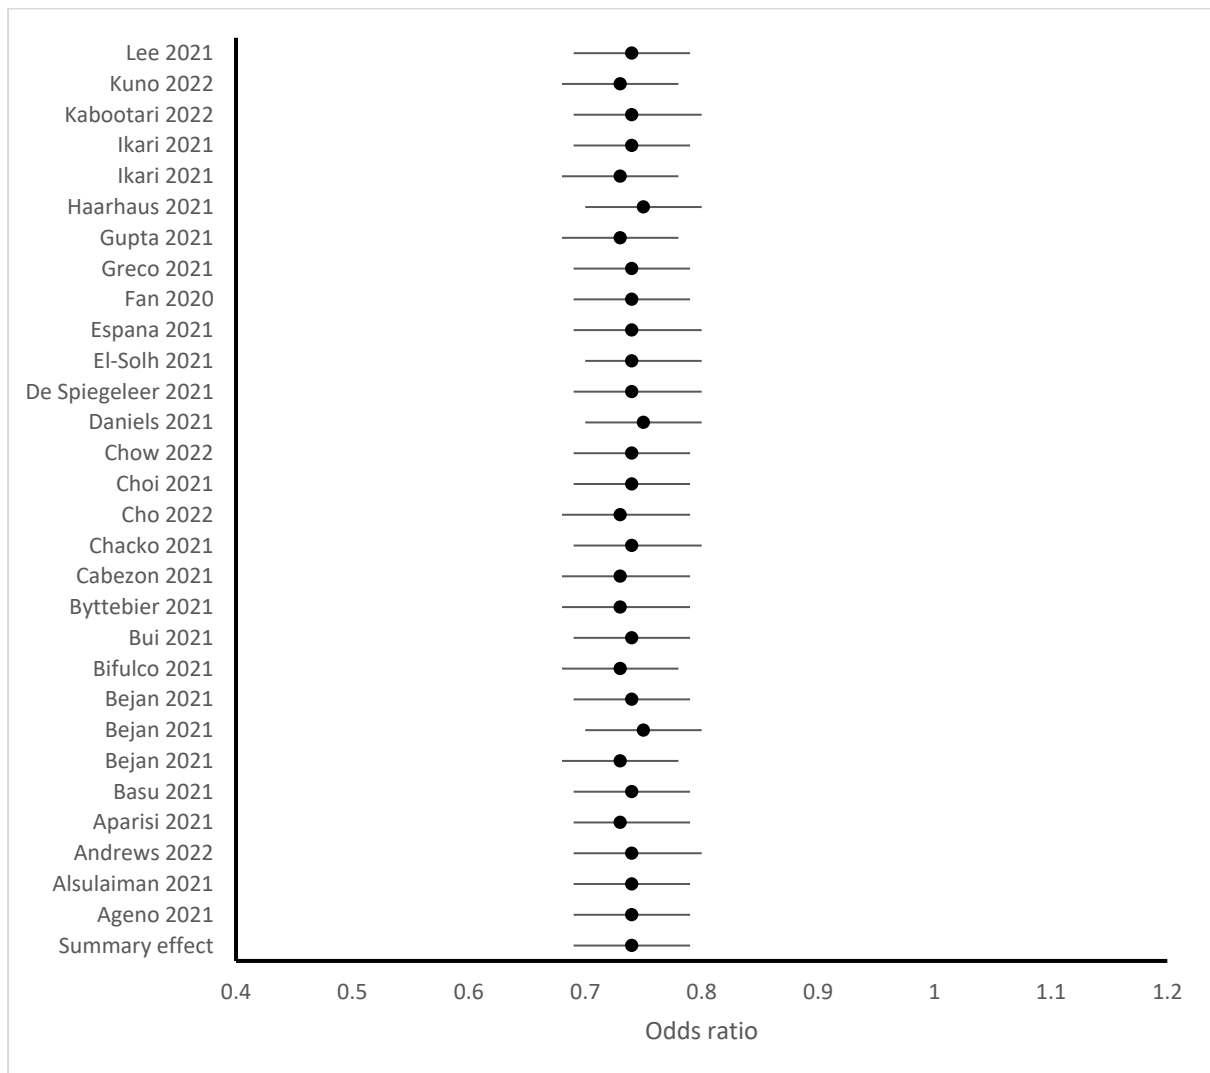

Sensitivity analysis of the data by observing the effect on the overall summary effect (shown at the bottom of the graph) through removing sequential studies. Our analysis reveal that there is no single study the removal of which affects the overall summary effect.

**Supplementary Figure S5 – Sensitivity analysis of studies with or without propensity score matching effect on mortality hazard ratio**

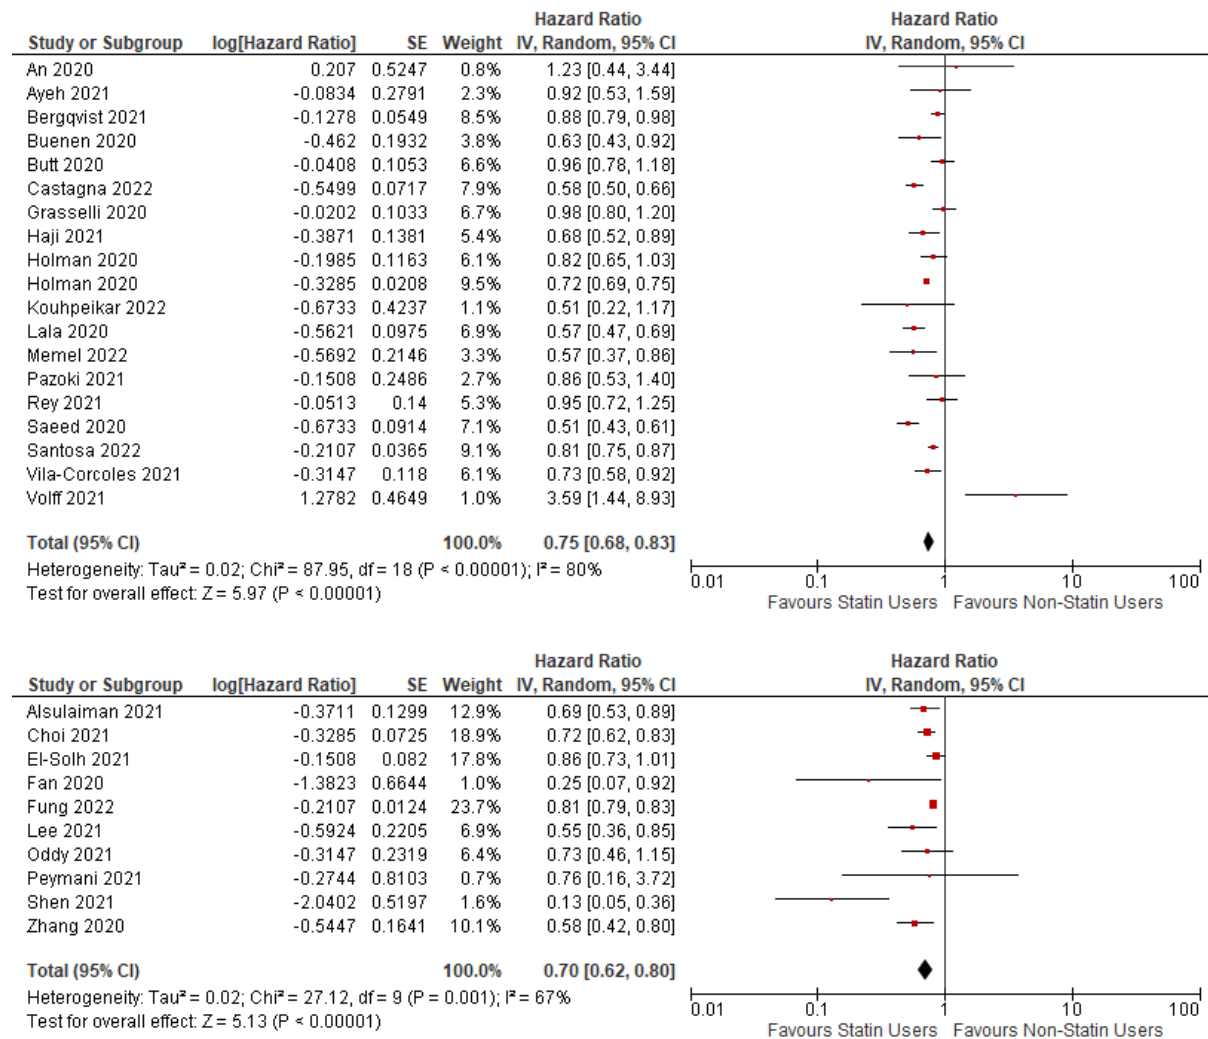

Sensitivity analysis of the mortality odds ratio summary effect by performing separate analysis of studies without (top) or with (bottom) propensity score matching. Our analysis reveal that studies with or without propensity score matching had qualitatively and quantitatively the same effect on the overall estimate. The extent of heterogeneity is improved in the analysis of studies which performed propensity score matching.

# Supplementary Figure S6 – Funnel plot and asymmetry analysis for ICU admission odds and hazard ratio

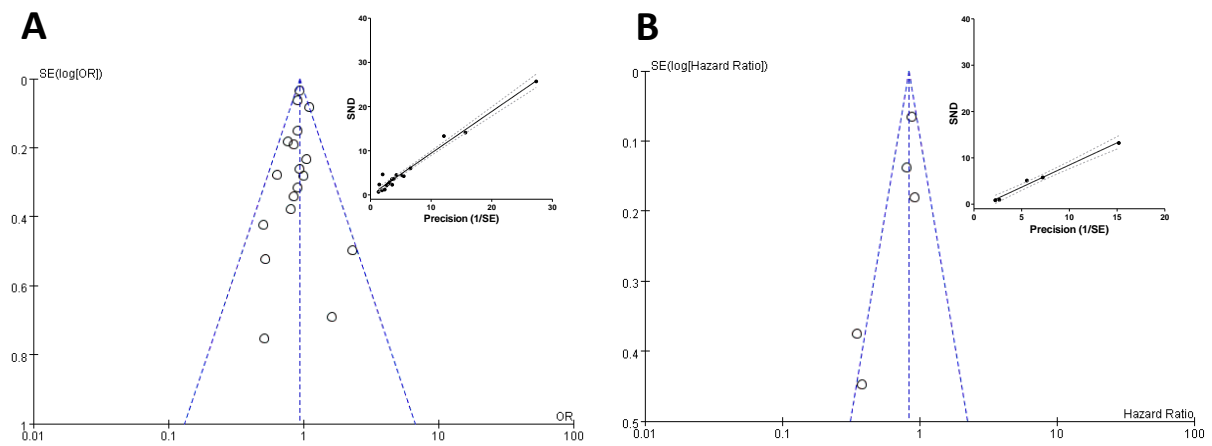

Funnel plots of the standard error of the logarithm of the ICU admission odds (A) or hazard ratio (B). Vertical dotted lines indicate the overall effect and the slanted dotted lines indicate the 95% confidence interval. Inset shows the Egger's regression of the standard normalised difference (SND) against the precision (1/SE). The solid lines are the non-weighted linear regression and the dotted lines indicate the 90% confidence interval of the linear regression. Our analysis reveal no significant asymmetry in the funnel plots ( $P = 0.87$  for OR and  $P = 0.26$  for HR).

### Supplementary Figure S7 – Funnel plot and asymmetry analysis for mechanical ventilation odds ratio

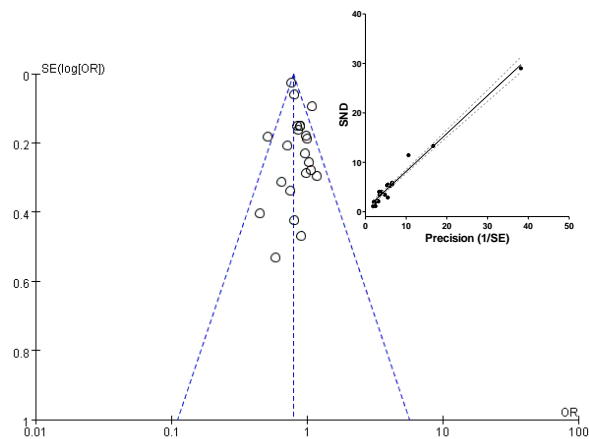

Funnel plots of the standard error of the logarithm of the ICU admission odds ratio. Vertical dotted lines indicate the overall effect and the slanted dotted lines indicate the 95% confidence interval. Inset shows the Egger's regression of the standard normalised difference (SND) against the precision (1/SE). The solid lines are the non-weighted linear regression and the dotted lines indicate the 90% confidence interval of the linear regression. Our analysis reveal no significant asymmetry in the funnel plot for the mechanical ventilation odds ratio ( $P = 0.29$ ).

**Supplementary Figure S8 - Sensitivity analysis of individual study effect on mechanical ventilation hazard ratio**

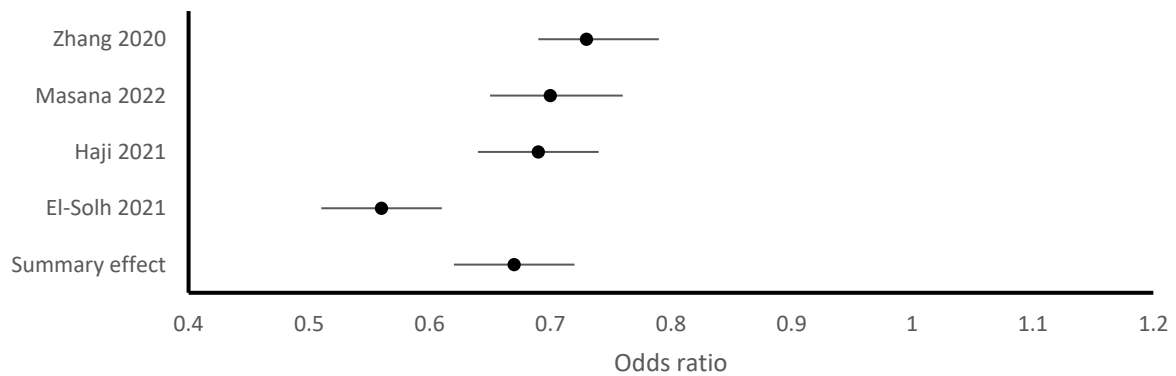

Sensitivity analysis of the data by observing the effect on the overall summary effect (shown at the bottom of the graph) through removing sequential studies. Removal of the El-Solh 2021 study produced a quantitative improvement in the overall estimate of the mechanical ventilation odds ratio.



**Supplementary Table S1 – Literature search strategy**

| All Fields (PubMed, Web of Science, Scopus) Broad Search (Embase), 2019/12/31 - 2022/04/22 |                                                                                                                                                                                                                                                                   |        |        |        |        |         |
|--------------------------------------------------------------------------------------------|-------------------------------------------------------------------------------------------------------------------------------------------------------------------------------------------------------------------------------------------------------------------|--------|--------|--------|--------|---------|
|                                                                                            | Search Terms                                                                                                                                                                                                                                                      | PubMed | Embase | WOS    | Scopus | Total   |
| 1                                                                                          | statins                                                                                                                                                                                                                                                           | 7686   | 27905  | 4986   | 20651  | 61228   |
| 2                                                                                          | HMG CoA reductase inhibitors                                                                                                                                                                                                                                      | 4148   | 27148  | 312    | 4453   | 36061   |
| 3                                                                                          | atorvastatin or lovastatin or pravastatin or rosuvastatin or fluvastatin                                                                                                                                                                                          | 2596   | 9307   | 3306   | 27725  | 42934   |
| 4                                                                                          | statins or HMG CoA reductase inhibitors or atorvastatin or lovastatin or pravastatin or rosuvastatin or fluvastatin                                                                                                                                               | 8374   | 28081  | 7110   | 6600   | 50165   |
|                                                                                            |                                                                                                                                                                                                                                                                   |        |        |        |        |         |
| 5                                                                                          | COVID 19                                                                                                                                                                                                                                                          | 252149 | 257877 | 255813 | 449883 | 1215722 |
| 6                                                                                          | coronavirus disease 2019                                                                                                                                                                                                                                          | 241717 | 216515 | 47423  | 258583 | 764238  |
| 7                                                                                          | 2019 nCoV                                                                                                                                                                                                                                                         | 159349 | 62674  | 2500   | 76765  | 301288  |
| 8                                                                                          | SARS CoV 2                                                                                                                                                                                                                                                        | 158885 | 107865 | 76872  | 207743 | 551365  |
| 9                                                                                          | COVID 19 or coronavirus disease 2019 or 2019 nCoV or SARS CoV 2                                                                                                                                                                                                   | 252149 | 270412 | 273450 | 167883 | 963894  |
|                                                                                            |                                                                                                                                                                                                                                                                   |        |        |        |        |         |
| 10                                                                                         | (statins or HMG CoA reductase inhibitors or atorvastatin or lovastatin or pravastatin or rosuvastatin or fluvastatin) AND (COVID 19 or coronavirus disease 2019 or 2019 nCoV or SARS CoV 2)                                                                       | 420    | 1549   | 338    |        |         |
|                                                                                            | (statins OR "HMG CoA reductase inhibitors" OR atorvastatin or lovastatin or pravastatin or rosuvastatin or fluvastatin) AND ("covid 19" OR "covid-19" OR "coronavirus disease 2019" OR "2019 nCoV" OR "2019-ncov" OR "sars cov 2" OR "sars-cov-2" OR "sars-cov2") |        |        |        | 3124   | 5431    |

**Supplementary Table S2 – Summary of included studies**

| Study            | Type of study | Country        | Before /During Hospitalization Statin Use | Type of Statin                                       | Sample Size<br>(Propensity score matched if applicable) |                  | Male (%) | Mean/Median Age (years)* | Diabetes (%)               | Outcome                                          |
|------------------|---------------|----------------|-------------------------------------------|------------------------------------------------------|---------------------------------------------------------|------------------|----------|--------------------------|----------------------------|--------------------------------------------------|
|                  |               |                |                                           |                                                      | Statin User                                             | Non-Statins User |          |                          |                            |                                                  |
| Agno 2021        | Cohort        | Italy          | Before                                    | N/A                                                  | 21                                                      | 91               | N/A      | N/A                      | N/A                        | Mortality                                        |
| Al-Sulaiman 2021 | Cohort        | Saudi Arabia   | During                                    | Atorvastatin, Rosuvastatin                           | 770 (251)                                               | 279 (251)        | 68.9     | 61.6 ± 14.8              | 59.0                       | Mortality; Mechanical ventilation                |
| An 2020          | Cohort        | South Korea    | Before                                    | N/A                                                  | 811                                                     | 7,189            | 39.9     | 45.0 ± 19.8              | 10.0                       | Mortality                                        |
| Andrews 2022     | Case-control  | United States  | Before                                    | Atorvastatin                                         | 34,474                                                  | 111,939          | 51.0     | 67                       | 40.5                       | Mortality; ICU admission; Mechanical ventilation |
| Aparisi 2021     | Case-control  | Spain          | Before                                    | N/A                                                  | 295                                                     | 545              | 50.8     | 68.2 ± 14.7              | 19.4                       | Mortality; ICU admission; Mechanical ventilation |
| Ayeh 2021        | Case-control  | United States  | Before                                    | Atorvastatin, Pravastatin, Rosuvastatin, Simvastatin | 594                                                     | 3,853            | 50.0     | 55.2                     | 18.4                       | Mortality                                        |
| Basu 2021        | Cohort        | United Kingdom | Before                                    | N/A                                                  | 459                                                     | 448              | 54.8     | 70.9 ± 16.7              | 45.9                       | Mortality                                        |
| Bejan 2021       | Cohort        | United States  | Before                                    | Rosuvastatin, Simvastatin, Atorvastatin              | 1,333                                                   | 26,285           | 39.8     | 42 ± 20                  | N/A                        | Mortality; ICU admission; Mechanical ventilation |
| Bergqvist 2021   | Case-control  | Sweden         | Before                                    | N/A                                                  | 169,642                                                 | 794,234          | 48.5     | 64.5                     | Type 1: 1.15, Type 2: 9.65 | Mortality                                        |
| Bifulco 2021     | Cohort        | Italy          | Before and during                         | N/A                                                  | 117                                                     | 425              | 63       | 65.1 ± 13.7              | 24.0                       | Mortality                                        |
| Buinen 2020      | Cohort        | Netherlands    | Before                                    | N/A                                                  | 209                                                     | 288              | 64       | 72                       | 20.5                       | Mortality                                        |
| Bui 2021         | Cohort        | United States  | Before                                    | N/A                                                  | 8                                                       | 42               | 56       | 70                       | 24                         | Mortality                                        |
| Butt 2020        | Cohort        | Denmark        | Before                                    | Atorvastatin, Simvastatin, Rosuvastatin, Pravastatin | 843                                                     | 3,999            | 47.1     | 54 (40-72)               | 8.6                        | Mortality                                        |
| Byttebier 2021   | Case-control  | Belgium        | During                                    | N/A                                                  | 178                                                     | 571              | 54.5     | 69.2                     | 19.6                       | Mortality                                        |
| Cabezon 2021     | Cohort        | Spain          | Before                                    | N/A                                                  | 295                                                     | 564              | 50.5     | 68.1                     | 19.3                       | Mortality                                        |
| Cariou 2021      | Cohort        | France         | Before                                    | N/A                                                  | 1,192                                                   | 1,257            | 64.0     | 70.9 ± 12.5              | 100                        | Mechanical ventilation                           |

|                    |               |               |                   |                                                                                |               |               |      |             |                                                                                                      |                                                  |
|--------------------|---------------|---------------|-------------------|--------------------------------------------------------------------------------|---------------|---------------|------|-------------|------------------------------------------------------------------------------------------------------|--------------------------------------------------|
| Castagna 2022      | Cohort        | United States | Before            | N/A                                                                            | 2,718         | 4,672         | 51.9 | 66 (55-77)  | 55.5                                                                                                 | Mortality                                        |
| Chacko 2021        | Case-control  | United States | Before            | N/A                                                                            | 116           | 139           | 51   | 65.4 ± 15.2 | 48.2                                                                                                 | Mortality; Mechanical ventilation                |
| Cho 2022           | Case-control  | Korea         | Before            | Atorvastatin, Rosuvastatin, Others                                             | 1,162         | 6,561         | 45.3 | 54          | 13.0                                                                                                 | Mortality                                        |
| Choi 2021          | Cohort        | United States | During            | Atorvastatin, Rosuvastatin                                                     | 1,720 (1,445) | 3,655 (1,445) | 56.6 | 67.1        | High-intensity statin user: 40.0; Low-to-moderate-intensity statin user: 36.8; Non-statin user: 16.1 | Mortality; Mechanical ventilation                |
| Chow 2022          | Cohort        | South Korea   | Before            | N/A                                                                            | 1,115         | 3,234         | 37.0 | 62.1        | 18.3                                                                                                 | Mortality; ICU admission; Mechanical ventilation |
| Daniels 2021       | Case-control  | United States | Before            | N/A                                                                            | 763           | 3,598         | 55   | 66 ± 14     | 40                                                                                                   | Mortality; ICU admission; Mechanical ventilation |
| De Spiegeleer 2021 | Cross-section | Belgium       | Before            | Simvastatin, Atorvastatin, Rosuvastatin, Pravastatin, Fluvastatin              | 185           | 909           | 29.1 | 85.2 ± 8.8  | 14.4                                                                                                 | Mortality                                        |
| El-Solh 2021       | Cohort        | United States | Before            | Atorvastatin, Rosuvastatin, Simvastatin                                        | 7,100 (2,692) | 7,168 (2,692) | 90.7 | 66 (53-74)  | 37.6                                                                                                 | Mortality; ICU admission; Mechanical ventilation |
| Espana 2021        | Cohort        | Spain         | Before            | N/A                                                                            | 789           | 2,778         | 30.3 | 84.2 ± 10.9 | 29.7                                                                                                 | Mortality                                        |
| Fan 2020           | Case-series   | China         | Before and during | Atorvastatin, Rosuvastatin, Pravastatin                                        | 250 (206)     | 1,897 (206)   | 48.5 | 62          | 13.6                                                                                                 | Mortality; ICU admission; Mechanical ventilation |
| Fayol 2021         | Cohort        | France        | Before            | N/A                                                                            | 58            | 195           | 68.8 | 64.7 ± 16.1 | 20.2                                                                                                 | ICU admission                                    |
| Fung 2022          | Case-control  | United States | Before            | Atorvastatin, Simvastatin, Lovastatin, Pitavastatin, Pravastatin, Rosuvastatin | 187,374       | 186,925       | 44.5 | N/A         | N/A                                                                                                  | Mortality                                        |
| Grasselli 2020     | Cohort        | Italy         | Before            | Atorvastatin, Fluvastatin, Lovastatin, Pravastatin, Rosuvastatin, Simvastatin  | 479           | 1,236         | 79.9 | 63 (56-69)  | 17.2                                                                                                 | Mortality                                        |

|                 |              |                |                   |                                                                                             |               |               |      |             |      |                                                  |
|-----------------|--------------|----------------|-------------------|---------------------------------------------------------------------------------------------|---------------|---------------|------|-------------|------|--------------------------------------------------|
| Greco 2021      | Cohort       | Italy          | Both and during   | Atorvastatin, Simvastatin, Pravastatin                                                      | 51            | 450           | 50.7 | 72 ± 17     | 13.0 | Mortality                                        |
| Gupta 2021      | Case-control | United States  | Before            | N/A                                                                                         | 951 (648)     | 1,675 (648)   | 57.0 | 66          | 36.9 | Mortality; Mechanical ventilation                |
| Haji 2021       | Cohort       | Iran           | During            | Atorvastatin                                                                                | 421           | 570           | 54.9 | 61.6 ± 17.0 | 30.6 | Mortality; Mechanical ventilation                |
| Holman 2020     | Cohort       | United Kingdom | Before            | N/A                                                                                         | N/A           | N/A           | 56.0 | 57.1        | 100  | Mortality                                        |
| Ikari 2021      | Case-control | Japan          | Before            | N/A                                                                                         | 214           | 479           | 65   | 68.3 ± 14.9 | 38   | Mortality; ICU admission; Mechanical ventilation |
| Kabootari 2022  | Cohort       | Iran           | Before            | N/A                                                                                         | 111           | 449           | 52   | 61.8 ± 13.4 | 100  | Mortality                                        |
| Kouhpeikar 2022 | Case-control | Iran           | During            | Atorvastatin                                                                                | 162           | 421           | 52.3 | 61.4 ± 0.9  | 13.9 | Mortality; ICU admission; Mechanical ventilation |
| Kuno 2022       | Case-control | United States  | Before and during | Atorvastatin, Fluvastatin, Lovastatin, Pitavastatin, Pravastatin, Rosuvastatin, Simvastatin | 2,423 (1,790) | 3,672 (1,790) | 56.2 | 65          | 21.9 | Mortality; ICU admission; Mechanical ventilation |
| Lala 2020       | Cohort       | United States  | Before            | N/A                                                                                         | 984           | 1,752         | 59.6 | 66.4        | 26.3 | Mortality                                        |
| Lee 2021        | Cohort       | Korea          | Before            | Atorvastatin, Fluvastatin, Lovastatin, Pitavastatin, Pravastatin, Rosuvastatin, Simvastatin | 533 (533)     | 9,915 (1,066) | 40.1 | 44.9 ± 19.8 | 17.9 | Mortality                                        |
| Li 2022         | Case-control | United States  | During            | Atorvastatin, Fluvastatin, Lovastatin, Pitavastatin, Pravastatin, Rosuvastatin, Simvastatin | 3,359 (2,817) | 5,538 (2,817) | 61.4 | 63.7        | 21.1 | Mortality; ICU admission; Mechanical ventilation |
| Lohia 2021 (1)  | Cohort       | United States  | Before            | Atorvastatin, Pravastatin, Rosuvastatin, Simvastatin, Lovastatin                            | 454 (233)     | 560 (233)     | 52.3 | 65 (53-73)  | 42.8 | Mortality; ICU admission; Mechanical ventilation |
| Lohia 2021 (2)  | Cohort       | United States  | Both              | Atorvastatin, Pravastatin, Rosuvastatin, Simvastatin                                        | 688 (229)     | 1,156 (229)   | 53.1 | 66 (56-73)  | 44.8 | Mortality; ICU admission; Mechanical ventilation |
| Luo 2020        | Cohort       | China          | During            | N/A                                                                                         | 55            | 228           | 55.1 | 64          | 100  | Mortality                                        |
| Ma 2021         | Cohort       | United Kingdom | Before            | N/A                                                                                         | N/A           | N/A           | 46.5 | 68.6 ± 8.3  | 13.0 | Mortality                                        |

|                           |               |                                                                                                         |                   |                                                                                                           |               |                |       |                    |      |                                                  |
|---------------------------|---------------|---------------------------------------------------------------------------------------------------------|-------------------|-----------------------------------------------------------------------------------------------------------|---------------|----------------|-------|--------------------|------|--------------------------------------------------|
| Mallow 2020               | Cohort        | United States                                                                                           | During            | N/A                                                                                                       | 5,313         | 16,363         | 52.8  | 64.9 ± 17.2        | 42.3 | Mortality                                        |
| Maric 2021                | Case-control  | United States                                                                                           | Before and during | Atorvastatin, Cerivastatin, Fluvastatin, Lovastatin, Pitavastatin, Pravastatin, Rosuvastatin, Simvastatin | 2,297 (2,297) | 16,169 (4,594) | 47.9  | 68.4               | 23.6 | Mortality                                        |
| Masana 2022               | Case-control  | Spain                                                                                                   | Before and during | Atorvastatin, Rosuvastatin                                                                                | 581 (581)     | 1,576 (581)    | 57.21 | 67 (54-78)         | 23.2 | Mortality; ICU admission; Mechanical ventilation |
| McAlister 2021            | Cohort        | Canada                                                                                                  | Before            | Simvastatin, Pravastatin, Atorvastatin, Rosuvastatin                                                      | 3,978         | 10,054         | 44.9  | 67.7               | 24.4 | Mortality; ICU admission                         |
| Mehra 2020                | Cohort        | United States, Canada, Spain, Italy, Germany, France, United Kingdom, Turkey, China, South Korea, Japan | Before            | N/A                                                                                                       | 860           | 8,050          | 60.0  | 49 ± 16            | 14.3 | Mortality                                        |
| Meintrup 2021             | Cohort        | Germany                                                                                                 | Before            | N/A                                                                                                       | 147           | 693            | N/A   | N/A                | N/A  | Mortality                                        |
| Memel 2022                | Cohort        | United States                                                                                           | Before and during | Atorvastatin, Rosuvastatin, Others                                                                        | 1,285         | 1,073          | 57.3  | 62                 | 34.2 | Mortality; ICU admission; Mechanical ventilation |
| Merzon 2021               | Cross-section | Israel                                                                                                  | Before            | N/A                                                                                                       | 24            | 88             | 55.4  | 62.9 ± 12.2        | 42.0 | Mortality                                        |
| Mitacchione 2021          | Case-control  | Italy                                                                                                   | Before            | Atorvastatin, Simvastatin, Rosuvastatin, Others                                                           | 179 (145)     | 663 (145)      | 62    | 64 (61-77)         | 17   | Mortality; ICU admission; Mechanical ventilation |
| Montserrat Villatoro 2022 | Case-control  | Spain                                                                                                   | Before            | Atorvastatin                                                                                              | N/A           | N/A            | 47.9  | 62.0 (48.0 - 78.0) | 17.7 | Mortality                                        |
| Nateghi 2021              | Cohort        | Iran                                                                                                    | Before            | Atorvastatin, Rosuvastatin                                                                                | 163           | 547            | 57.5  | 57.0 ± 17.2        | 30   | Mortality; ICU admission                         |
| Nicholson 2021            | Cohort        | United States                                                                                           | Before            | N/A                                                                                                       | 511 (180)     | 531 (224)      | 56.8  | 64 (53-75)         | 42.5 | Mortality; Mechanical ventilation                |
| Oddy 2021                 | Cohort        | United Kingdom                                                                                          | Before            | Atorvastatin, Simvastatin                                                                                 | 222 (222)     | 390 (197)      | 57.8  | 69.6 ± 17.8        | N/A  | Mortality; ICU admission                         |
| Oh 2021                   | Cohort        | South Korea                                                                                             | Before            | N/A                                                                                                       | N/A           | N/A            | N/A   | N/A                | N/A  | Mortality                                        |
| Pazoki 2021               | Cohort        | Iran                                                                                                    | Before            | N/A                                                                                                       | 107           | 286            | 56.2  | 65.4 ± 11.6        | 100  | Mortality                                        |

|                     |               |                |                   |                                                      |             |             |      |                  |                           |                                                  |
|---------------------|---------------|----------------|-------------------|------------------------------------------------------|-------------|-------------|------|------------------|---------------------------|--------------------------------------------------|
| Peymani 2021        | Cohort        | Iran           | Before and during | Atorvastatin, Rosuvastatin, Simvastatin              | 75 (75)     | 75 (75)     | 58.0 | 54.7 ± 4.4       | 21.3                      | Mortality; Mechanical ventilation                |
| Philipose 2020      | Cohort        | United Kingdom | Before            | Atorvastatin                                         | 164         | 302         | 59.4 | 72               | Type 1: 1.3; Type 2: 34.1 | Mortality                                        |
| Ramachandran 2020   | Cohort        | New York       | Before            | N/A                                                  | 114         | 181         | 54.9 | 66               | 44.7                      | Mortality                                        |
| Ramos-Rincon 2021   | Cohort        | Spain          | Before            | N/A                                                  | 415         | 368         | 52.8 | 85.8             | 100                       | Mortality                                        |
| Rey 2021            | Case-control  | Spain          | Before            | N/A                                                  | 827         | 1,364       | 56.9 | 68.0 ± 17.8      | 22.2                      | Mortality                                        |
| Rosenthal 2020      | Cohort        | United States  | Before            | N/A                                                  | 11,970      | 23,332      | 53.4 | 63.6 ± 17.7      | 25.1                      | Mortality                                        |
| Saeed 2020          | Case-control  | United States  | During            | Atorvastatin, Pravastatin, Rosuvastatin, Simvastatin | 1,355       | 2,897       | 53   | 65 ± 16          | 53                        | Mortality                                        |
| Santosa 2022        | Cohort        | Sweden         | Before            | N/A                                                  | 52,128      | 242,785     | 48.9 | 70.9             | 7.5                       | Mortality; ICU admission                         |
| Shen 2021           | Case-control  | China          | During            | N/A                                                  | 404 (302)   | 2,729 (302) | 50.2 | 62 ± 19          | 13.2                      | Mortality; Mechanical ventilation                |
| Soldevila 2021      | Cross-section | Spain          | Before            | Atorvastatin, Lovastatin, Rosuvastatin, Simvastatin  | 224         | 1,082       | 27.7 | 86.7             | N/A                       | Mortality                                        |
| Song 2020           | Cohort        | United States  | Before and during | N/A                                                  | 123         | 126         | 57   | 62 (51-75)       | 33.3                      | Mortality; ICU admission; Mechanical ventilation |
| Svensson 2021       | Case-control  | Sweden         | Before            | N/A                                                  | 288         | 798         | 74.9 | 62.0 (52.0-70.0) | Type 1: 0.8; Type 2: 25.4 | Mechanical ventilation                           |
| Terlecki 2021       | Cohort        | Poland         | Before            | N/A                                                  | 269         | 1,460       | 51.2 | 63 (50-75)       | 25.7                      | Mortality                                        |
| Tignanelli 2021     | Cohort        | United States  | Before            | N/A                                                  | 4,286       | 22,610      | 56   | 51.1 (34.6-67.4) | Type 1: 2.84 Type 2: 14.5 | Mortality                                        |
| Torres-Pena 2021    | Cross-section | Spain          | Before and during | N/A                                                  | 1,130 (934) | 1,791 (934) | 60.3 | 72.5             | 26.3                      | Mortality; Mechanical ventilation                |
| Umakanthan 2021     | Cohort        | India          | Before            | N/A                                                  | 1,048 (768) | 2,204 (768) | 55.8 | 61               | 47.5                      | Mortality; Mechanical ventilation                |
| Vahedian-Azimi 2021 | Cohort        | Iran           | Before            | Atorvastatin                                         | 326         | N/A         | 67.3 | 54.9 ± 13.8      | 25.2                      | Mortality; ICU admission                         |
| Vila-Corcoles 2021  | Cohort        | Spain          | Before            | N/A                                                  | 91          | 445         | 43.8 | 65.8 ± 11.3      | 23.5                      | Mortality                                        |
| Volff 2021          | Cohort        | France         | Before            | N/A                                                  | 32          | 140         | 73.3 | 63 (55-71.25)    | 32                        | Mortality; Mechanical ventilation                |

|             |              |               |        |                                                                                             |             |                |      |             |      |                                                  |
|-------------|--------------|---------------|--------|---------------------------------------------------------------------------------------------|-------------|----------------|------|-------------|------|--------------------------------------------------|
| Wander 2021 | Cohort       | United States | Before | N/A                                                                                         | 12,781      | 23,098         | 89   | 60.3 ± 17.0 | 39   | Mortality; ICU admission                         |
| Wander 2022 | Cohort       | United States | Before | Atorvastatin, Fluvastatin, Lovastatin, Pitavastatin, Pravastatin, Rosuvastatin, Simvastatin | 69,263      | 161,891        | 90   | 60.9 ± 16.5 | 36.9 | Mortality; ICU admission                         |
| Wargny 2021 | Cohort       | France        | Before | N/A                                                                                         | 1,282       | 1,512          | 63.7 | 69.7 ± 13.2 | 100  | Mortality                                        |
| Yetmar 2021 | Cohort       | United States | Before | Atorvastatin, Rosuvastatin, Fluvastatin, Lovastatin, Pitavastatin, Pravastatin, Simvastatin | 500         | 795            | 55.4 | 60          | 30.1 | Mortality                                        |
| Zhang 2020  | Case-control | China         | During | Atorvastatin, Rosuvastatin, Simvastatin, Pravastatin, Fluvastatin, Pitavastatin             | 1,219 (861) | 12,762 (3,444) | 48.9 | 61.5        | 16.3 | Mortality; ICU admission; Mechanical ventilation |
| Zhong 2020  | Cohort       | China         | Before | N/A                                                                                         | 11          | 115            | 44.4 | 66          | 32.5 | Mortality                                        |

**Supplementary Table S3 – Newcastle-Ottawa Scale assessment of study quality**

| <b>Study</b>       | <b>Selection of Cohorts</b> | <b>Comparability of Cohorts</b> | <b>Outcome</b> | <b>Total Score</b> | <b>Quality</b> |
|--------------------|-----------------------------|---------------------------------|----------------|--------------------|----------------|
| Ageno 2021         | ★★★                         |                                 | ★★★            | 6                  | Good           |
| Alsulaiman 2021    | ★★★                         | ★                               | ★★★            | 7                  | Good           |
| An 2020            | ★★★★                        |                                 | ★★             | 6                  | Good           |
| Andrews 2022       | ★★★★                        | ★                               | ★★★            | 8                  | Good           |
| Aparisi 2021       | ★★★★                        | ★                               | ★★★            | 8                  | Good           |
| Ayeh 2021          | ★★★★                        |                                 | ★★★            | 7                  | Good           |
| Basu 2021          | ★★★★                        |                                 | ★★★            | 7                  | Good           |
| Bejan 2021         | ★★★★                        |                                 | ★★★            | 7                  | Good           |
| Bergqvist 2021     | ★★★★                        | ★                               | ★★★            | 8                  | Good           |
| Bifulco 2021       | ★★★★                        | ★                               | ★★★            | 8                  | Good           |
| Buenen 2020        | ★★★★                        |                                 | ★★★            | 7                  | Good           |
| Bui 2021           | ★★★                         |                                 | ★★★            | 6                  | Good           |
| Butt 2020          | ★★★★                        |                                 | ★★★            | 7                  | Good           |
| Byttebier 2021     | ★★★★                        | ★★                              | ★★★            | 9                  | Good           |
| Cabezon 2021       | ★★★★                        |                                 | ★★★            | 7                  | Good           |
| Cariou 2021        | ★★★                         | ★★                              | ★★★            | 8                  | Good           |
| Castagna 2022      | ★★★★                        |                                 | ★★★            | 7                  | Good           |
| Chacko 2021        | ★★★★                        | ★                               | ★★★            | 8                  | Good           |
| Cho 2022           | ★★★★                        |                                 | ★★★            | 7                  | Good           |
| Choi 2021          | ★★★★                        | ★                               | ★★★            | 8                  | Good           |
| Chow 2022          | ★★★★                        | ★                               | ★★★            | 8                  | Good           |
| Daniels 2021       | ★★★★                        | ★                               | ★★★            | 8                  | Good           |
| De Spiegeleer 2021 | ★★★                         | ★                               | ★★★            | 7                  | Good           |
| El-Solh 2021       | ★★★★                        | ★                               | ★★★            | 8                  | Good           |



|                 |      |    |     |   |      |
|-----------------|------|----|-----|---|------|
| Espana 2021     | ★★★★ |    | ★★★ | 7 | Good |
| Fan 2020        | ★★★★ | ★★ | ★★★ | 9 | Good |
| Fayol 2021      | ★★★★ |    | ★★★ | 7 | Good |
| Fung 2022       | ★★★★ |    | ★★★ | 7 | Good |
| Grasselli 2020  | ★★★  |    | ★★★ | 6 | Good |
| Greco 2021      | ★★★★ | ★  | ★★★ | 8 | Good |
| Gupta 2021      | ★★★★ | ★★ | ★★★ | 9 | Good |
| Haarhaus 2021   | ★★★  |    | ★★★ | 6 | Good |
| Haji 2021       | ★★★★ | ★★ | ★★★ | 9 | Good |
| Holman 2020     | ★★★  | ★  | ★★★ | 7 | Good |
| Ikari 2021      | ★★★  | ★★ | ★★★ | 8 | Good |
| Kabootari 2022  | ★★★  |    | ★★★ | 6 | Good |
| Kouhpeikar 2022 | ★★★★ | ★  | ★★★ | 8 | Good |
| Kuno 2022       | ★★★★ | ★★ | ★★★ | 9 | Good |
| Lala 2020       | ★★★★ |    | ★★★ | 8 | Good |
| Lee 2021        | ★★★★ | ★★ | ★★★ | 9 | Good |
| Li 2022         | ★★★★ | ★★ | ★★★ | 9 | Good |
| Lohia 2021      | ★★★★ | ★★ | ★★★ | 9 | Good |
| Lohia 2021 (2)  | ★★★★ | ★★ | ★★★ | 9 | Good |
| Luo 2020        | ★★★  |    | ★★★ | 6 | Good |
| Ma 2021         | ★★★  |    | ★★★ | 6 | Good |
| Mallow 2020     | ★★★★ |    | ★★  | 6 | Good |
| Maric 2021      | ★★★★ | ★  | ★★★ | 8 | Good |
| Masana 2022     | ★★★★ | ★  | ★★★ | 8 | Good |
| McAlister 2021  | ★★★★ | ★  | ★★★ | 8 | Good |
| Mehra 2020      | ★★★★ |    | ★★★ | 7 | Good |

|                           |      |    |     |   |      |
|---------------------------|------|----|-----|---|------|
| Meintrup 2021             | ★★★★ |    | ★★★ | 7 | Good |
| Memel 2022                | ★★★★ |    | ★★★ | 7 | Good |
| Merzon 2021               | ★★★★ |    | ★★★ | 7 | Good |
| Mitacchione 2021          | ★★★★ | ★★ | ★★★ | 9 | Good |
| Montserrat Villatoro 2022 | ★★★★ |    | ★★★ | 7 | Good |
| Nateghi 2021              | ★★★★ | ★  | ★★★ | 8 | Good |
| Nicholson 2021            | ★★★★ |    | ★★★ | 7 | Good |
| Oddy 2021                 | ★★★★ |    | ★★★ | 7 | Good |
| Oh 2021                   | ★★★★ | ★★ | ★★  | 8 | Good |
| Pazoki 2021               | ★★★  |    | ★★★ | 6 | Good |
| Peymani 2021              | ★★★★ | ★  | ★★★ | 8 | Good |
| Philipose 2020            | ★★★★ |    | ★★★ | 7 | Good |
| Ramachandran 2020         | ★★★★ |    | ★★★ | 7 | Good |
| Ramos-Rincon 2021         | ★★★  |    | ★★★ | 6 | Good |
| Rey 2021                  | ★★★★ | ★  | ★★★ | 8 | Good |
| Rosenthal 2020            | ★★★★ |    | ★★★ | 7 | Good |
| Saeed 2020                | ★★★★ | ★  | ★★★ | 8 | Good |
| Santosa 2022              | ★★★★ | ★  | ★★★ | 8 | Good |
| Shen 2021                 | ★★★★ | ★★ | ★★★ | 9 | Good |
| Soldevila 2021            | ★★★  |    | ★★★ | 6 | Good |
| Song 2020                 | ★★★★ | ★★ | ★★  | 8 | Good |
| Svensson 2021             | ★★★  |    | ★★★ | 6 | Good |
| Terlecki 2021             | ★★★★ |    | ★★★ | 7 | Good |
| Tignanelli 2021           | ★★★★ |    | ★★  | 6 | Good |
| Torres-Pena 2021          | ★★★★ | ★★ | ★★★ | 9 | Good |
| Umakanthan 2021           | ★★★★ | ★★ | ★★★ | 9 | Good |

|                     |      |   |     |   |      |
|---------------------|------|---|-----|---|------|
| Vahedian-Azimi 2021 | ★★★★ |   | ★★  | 6 | Good |
| Vila-Corcoles 2021  | ★★★  |   | ★★★ | 6 | Good |
| Volff 2021          | ★★★  |   | ★★★ | 6 | Good |
| Wander 2021         | ★★★★ |   | ★★  | 6 | Good |
| Wander 2022         | ★★★★ | ★ | ★★★ | 8 | Good |
| Wargny 2021         | ★★★  |   | ★★★ | 6 | Good |
| Yetmar 2021         | ★★★★ | ★ | ★★★ | 8 | Good |
| Zhang 2020          | ★★★★ | ★ | ★★★ | 8 | Good |
| Zhong 2020          | ★★★  |   | ★★★ | 6 | Good |
